# Supplementary material
Source: publisher site journal article supplement (https://www.spandidos-publications.com/6767/downloadSupplementary)
Supplement: Supplementary file 1 [file downloadSupplementary]

Table SII. Primers used for reverse transcription-quantitative PCR.

| Primer set | Primers | Sequence (5'-3')        |
|------------|---------|-------------------------|
| FGF21      | Forward | GGGAGTCAAGACATCCAGGT    |
|            | Reverse | GGCTTCGGACTGGTAAACAT    |
| IL1B       | Forward | AGATGATAAGCCCACTCTACAG  |
|            | Reverse | ACATTCAGCACAGGACTCTC    |
| IL1A       | Forward | ATCAGTACCTCACGGCTGCTG   |
|            | Reverse | TGGGCAGTCACATACAATTGAGT |
| NGF        | Forward | CACACTGAGGTGCATAGCGT    |
|            | Reverse | TGATGACCGCTTGCTCCTGT    |
| DDIT3      | Forward | GGAGCATCAGTCCCCCACTT    |
|            | Reverse | TGTGGGATTGAGGGTCACATC   |
| CTH        | Forward | CATGAGTTGGTGAAGCGTCAG   |
|            | Reverse | AGCTCTCGGCCAGAGTAAATA   |
| ASNS       | Forward | ATTGGCTGCCTTTTATCAGGG   |
|            | Reverse | TGTCTTCCATGCCAATTGCA    |
| NUPR1      | Forward | CTGGCCCATTCTACCTCG      |
|            | Reverse | TCTCTTGGTGCGACCTTTC     |
| GAPDH      | Forward | TCACCACCATGGAGAAGGCT    |
|            | Reverse | TTCACACCCATGACGAACAT    |

ASNS, asparagine synthetase (glutamine-hydrolyzing); CTH, cystathionine  $\gamma$ -lyase; DDIT3, DNA damage inducible transcript 3; FGF21, fibroblast growth factor 21; NGF, nerve growth factor; NUPR1, nuclear protein 1, transcriptional regulator.

Table SIII. Primary and secondary antibodies used for western blotting.

| Antibody                                                              | Isotype | Host species | Clonality  | Cat. no. | Company                         |
|-----------------------------------------------------------------------|---------|--------------|------------|----------|---------------------------------|
| Anti-ERK1 + ERK2 antibody                                             | IgG     | Rabbit       | Polyclonal | ab17942  | Abcam                           |
| Anti-ERK1 (phospho T202 + Y204) + ERK2 (phospho T185 + Y187) antibody | IgG     | Rabbit       | Polyclonal | ab214362 | Abcam                           |
| Anti-pan-AKT antibody                                                 | IgG     | Rabbit       | Polyclonal | ab8805   | Abcam                           |
| Anti-AKT1 (phospho S473) antibody (EP2109Y)                           | IgG     | Rabbit       | Polyclonal | ab81283  | Abcam                           |
| Anti-mTOR antibody                                                    | IgG     | Rabbit       | Polyclonal | ab2732   | Abcam                           |
| Phospho-mTOR (Ser2448) antibody                                       | IgG     | Rabbit       | Monoclonal | 2971     | Cell Signaling Technology, Inc. |
| p38 MAPK antibody                                                     | IgG     | Rabbit       | Polyclonal | 9212     | Cell Signaling Technology, Inc. |
| Phosphorylated p38 MAPK (Thr180/Tyr182)                               | IgG     | Rabbit       | Polyclonal | 9211     | Cell Signaling Technology, Inc. |
| Anti-Ki67 antibody                                                    | IgG     | Rabbit       | Monoclonal | ab92742  | Abcam                           |
| Anti- $\beta$ actin antibody (AC-15)                                  | IgG1    | Mouse        | Monoclonal | ab6276   | Abcam                           |
| Goat Anti-Mouse IgG H&L (HRP)                                         | IgG     | Goat         | Polyclonal | ab205719 | Abcam                           |
| Goat Anti-Rabbit IgG H&L (HRP)                                        | IgG     | Goat         | Polyclonal | ab205718 | Abcam                           |
